# Supplementary material for: Eating Competence and Aspects Related to a Gluten-Free Diet in Brazilian Adults with Gluten-Related Disorders
Source: MDPI journal article supplement (doi:10.3390/nu14142815), 2022-07-08
Supplement: s1 [file s1]

**Table S1.** Factors associated with the gluten-free diet.

|                                                                                                                                                         | Freq.* | %     |
|---------------------------------------------------------------------------------------------------------------------------------------------------------|--------|-------|
| <b>What is the main reason you follow a gluten-free diet?</b>                                                                                           |        |       |
| Gluten/wheat allergy                                                                                                                                    | 95     | 7.9%  |
| Celiac disease                                                                                                                                          | 781    | 64.9% |
| Dermatitis herpetiformis                                                                                                                                | 84     | 7.0%  |
| Non-celiac gluten sensitivity                                                                                                                           | 244    | 20.2% |
| <b>If you buy sometimes or never buy special gluten-free products (e.g., gluten-free bread, gluten-free pasta, gluten-free cake, etc.), why?</b>        |        |       |
| They are expensive                                                                                                                                      | 206    | 36.9% |
| I don't like                                                                                                                                            | 51     | 9.1%  |
| Stores are difficult to access                                                                                                                          | 79     | 14.1% |
| I can't find gluten-free products to buy                                                                                                                | 44     | 7.9%  |
| I don't know this type of product                                                                                                                       | 0      | 0%    |
| I don't trust these products                                                                                                                            | 16     | 2.9%  |
| I prepare my gluten-free products at home                                                                                                               | 136    | 24.3% |
| Other                                                                                                                                                   | 27     | 4.8%  |
| <b>If you do not consume special gluten-free products (e.g., gluten-free bread, gluten-free cake, gluten-free cookies, etc.) prepared at home, why?</b> |        |       |
| Ingredients are expensive                                                                                                                               | 257    | 38.6% |
| I can't easily find the ingredients to prepare these recipes                                                                                            | 138    | 20.7% |
| I don't know/I don't like to cook, OR I don't have someone to prepare my food                                                                           | 79     | 11.9% |
| I don't have time to cook                                                                                                                               | 141    | 21.2% |
| Other                                                                                                                                                   | 51     | 7.6%  |
| <b>What helps you maintain your gluten-free diet?</b>                                                                                                   |        |       |
| I prepare gluten-free foods at home.                                                                                                                    | 852    | 46.9% |
| Someone prepares gluten-free food for me                                                                                                                | 256    | 14.1% |
| I have easy access to this type of product (restaurants, stores, markets, fairs, people, internet, etc.)                                                | 259    | 14.2% |
| I have the financial availability to purchase gluten-free products                                                                                      | 328    | 18.0% |
| Other                                                                                                                                                   | 123    | 6.8%  |
| <b>What are the difficulties you have in following a gluten-free diet?</b>                                                                              |        |       |
| I don't understand what foods I can and can't eat                                                                                                       | 23     | 1.2%  |
| I don't have time to prepare different meals                                                                                                            | 179    | 9.0%  |
| Gluten-free food tastes unpleasant                                                                                                                      | 117    | 5.9%  |
| Gluten-free foods have an unpleasant texture                                                                                                            | 173    | 8.8%  |
| Gluten-free foods are expensive                                                                                                                         | 583    | 29.5% |
| The health professional does not provide enough guidance to follow a gluten-free diet                                                                   | 140    | 7.1%  |
| I feel different from others following the gluten-free diet                                                                                             | 219    | 11.1% |
| I don't understand the food label                                                                                                                       | 30     | 1.5%  |
| Other                                                                                                                                                   | 135    | 6.8%  |
| I have no difficulty                                                                                                                                    | 377    | 19.1% |

\* The frequencies can exceed 1030 since it allows multiple responses.

**Table S2.** Crossing the scores of the ecSI2.0™BR and sociodemographic data of celiac patients (*n* = 781).

|                                                                                 |                                       | Eating<br>attitude        | Food<br>acceptance        | Internal<br>regulation    | Contextual<br>skills       | Total                      | ecSI2.0™BR<br>≥ 32         |
|---------------------------------------------------------------------------------|---------------------------------------|---------------------------|---------------------------|---------------------------|----------------------------|----------------------------|----------------------------|
|                                                                                 |                                       | Mean (SD)                 | Mean (SD)                 | Mean (SD)                 | Mean (SD)                  | Mean (SD)                  | Freq. (%)                  |
| <b>Gender</b>                                                                   | Female (n=742)                        | 11.95 (3.56) <sup>a</sup> | 5.00 (2.26) <sup>a</sup>  | 4.08 (1.44) <sup>a</sup>  | 11.20 (3.06) <sup>a</sup>  | 32.22 (7.92) <sup>a</sup>  | 433 (58.4%) <sup>a</sup>   |
|                                                                                 | Male (n=39)                           | 12.15 (3.89) <sup>a</sup> | 4.77 (1.98) <sup>a</sup>  | 4.36 (1.20) <sup>a</sup>  | 10.95 (3.09) <sup>a</sup>  | 32.23 (7.74) <sup>a</sup>  | 21.00 (53.8%) <sup>a</sup> |
|                                                                                 | p                                     | 0.729*                    | 0.539*                    | 0.231*                    | 0.624*                     | 0.993*                     | 0.578***                   |
|                                                                                 |                                       |                           |                           |                           |                            |                            |                            |
| <b>Age</b>                                                                      | Up to 40 years old (n=396)            | 11.80 (3.53) <sup>a</sup> | 4.85 (2.29) <sup>a</sup>  | 3.99 (1.44) <sup>a</sup>  | 10.70 (3.16) <sup>a</sup>  | 31.34 (7.95) <sup>a</sup>  | 211 (53.3%) <sup>a</sup>   |
|                                                                                 | 40 years or older (n=385)             | 12.13 (3.62) <sup>a</sup> | 5.12 (2.19) <sup>a</sup>  | 4.19 (1.41) <sup>a</sup>  | 11.68 (2.87) <sup>b</sup>  | 33.12 (7.76) <sup>b</sup>  | 243 (63.1%) <sup>b</sup>   |
|                                                                                 | p                                     | 0.199*                    | 0.086*                    | 0.053*                    | 0.000*                     | 0.002*                     | 0.005***                   |
| <b>Educational level</b>                                                        |                                       |                           |                           |                           |                            |                            |                            |
|                                                                                 | Up to high school (n=114)             | 11.75 (3.77) <sup>a</sup> | 4.76 (2.24) <sup>a</sup>  | 4.26 (1.49) <sup>a</sup>  | 11.40 (3.08) <sup>a</sup>  | 32.18 (7.81) <sup>a</sup>  | 61 (53.5%) <sup>a</sup>    |
|                                                                                 | Undergraduate (n=306)                 | 11.95 (3.52) <sup>a</sup> | 4.90 (2.22) <sup>a</sup>  | 4.07 (1.45) <sup>a</sup>  | 10.99 (3.22) <sup>a</sup>  | 31.91 (7.96) <sup>a</sup>  | 175 (57.2%) <sup>a</sup>   |
|                                                                                 | Graduate (n=361)                      | 12.04 (3.57) <sup>a</sup> | 5.12 (2.26) <sup>a</sup>  | 4.06 (1.39) <sup>a</sup>  | 11.28 (2.91) <sup>a</sup>  | 32.50 (7.89) <sup>a</sup>  | 218 (60.4%) <sup>a</sup>   |
|                                                                                 | p                                     | 0.746**                   | 0.231**                   | 0.382**                   | 0.332**                    | 0.623**                    | 0.393***                   |
| <b>Income</b>                                                                   |                                       |                           |                           |                           |                            |                            |                            |
|                                                                                 | Up to R\$ 3,000.00 (n=185)            | 11.63 (3.72) <sup>a</sup> | 4.71 (2.27) <sup>a</sup>  | 4.05 (1.51) <sup>a</sup>  | 10.82 (3.35) <sup>a</sup>  | 31.21 (8.29) <sup>a</sup>  | 98 (53.0%) <sup>a</sup>    |
|                                                                                 | R\$ 3,001.00 to R\$ 5,000.00 (n=159)  | 11.77 (3.52) <sup>a</sup> | 4.82 (2.30) <sup>a</sup>  | 4.09 (1.48) <sup>a</sup>  | 10.93 (3.00) <sup>a</sup>  | 31.62 (7.89) <sup>a</sup>  | 85 (53.5%) <sup>a</sup>    |
|                                                                                 | R\$ 5,001.00 to R\$ 10,000.00 (n=196) | 12.35 (3.47) <sup>a</sup> | 5.22 (2.11) <sup>a</sup>  | 4.23 (1.31) <sup>a</sup>  | 11.61 (3.00) <sup>a</sup>  | 33.41 (7.53) <sup>a</sup>  | 127 (64.8%) <sup>a</sup>   |
|                                                                                 | R\$ 10,001.00 to R\$20,000.00 (n=147) | 12.01 (3.45) <sup>a</sup> | 5.06 (2.28) <sup>a</sup>  | 4.03 (1.40) <sup>a</sup>  | 11.30 (2.75) <sup>a</sup>  | 32.40 (7.42) <sup>a</sup>  | 88 (59.9%) <sup>a</sup>    |
|                                                                                 | More than R\$ 20,000.00 (n=39)        | 12.03 (3.41) <sup>a</sup> | 5.13 (2.74) <sup>a</sup>  | 3.85 (1.44) <sup>a</sup>  | 10.74 (3.48) <sup>a</sup>  | 31.74 (9.16) <sup>a</sup>  | 24 (61.5%) <sup>a</sup>    |
|                                                                                 | p                                     | 0.340**                   | 0.212**                   | 0.486**                   | 0.082**                    | 0.073**                    | 0.117***                   |
|                                                                                 |                                       |                           |                           |                           |                            |                            |                            |
|                                                                                 |                                       |                           |                           |                           |                            |                            |                            |
|                                                                                 |                                       |                           |                           |                           |                            |                            |                            |
| <b>Do you have any other restrictions besides gluten?</b>                       |                                       |                           |                           |                           |                            |                            |                            |
|                                                                                 | Yes (n=484)                           | 11.87 (3.71) <sup>a</sup> | 5.08 (2.25) <sup>a</sup>  | 4.06 (1.44) <sup>a</sup>  | 11.33 (2.95) <sup>a</sup>  | 32.34 (8.01) <sup>a</sup>  | 286 (59.1%) <sup>a</sup>   |
|                                                                                 | No (n=297)                            | 12.10 (3.36) <sup>a</sup> | 4.83 (2.23) <sup>a</sup>  | 4.15 (1.40) <sup>a</sup>  | 10.94 (3.22) <sup>a</sup>  | 32.02 (7.73) <sup>a</sup>  | 168 (56.6%) <sup>a</sup>   |
|                                                                                 | p                                     | 0.390*                    | 0.136*                    | 0.363*                    | 0.081*                     | 0.586*                     | 0.487***                   |
| <b>Do you follow a gluten-free diet?</b>                                        |                                       |                           |                           |                           |                            |                            |                            |
|                                                                                 | Never/almost never (n=4)              | 11.75 (2.22) <sup>a</sup> | 3.50 (2.65) <sup>a</sup>  | 4.75 (1.50) <sup>a</sup>  | 8.25 (6.24) <sup>ab</sup>  | 28.25 (8.54) <sup>ab</sup> | 1 (25.0%) <sup>ab</sup>    |
|                                                                                 | Sometimes (n=11)                      | 10.64 (4.92) <sup>a</sup> | 4.18 (3.06) <sup>a</sup>  | 3.64 (1.86) <sup>a</sup>  | 7.00 (2.97) <sup>a</sup>   | 25.45 (8.82) <sup>b</sup>  | 3 (27.3%) <sup>a</sup>     |
|                                                                                 | Always/almost always (n=766)          | 11.98 (3.56) <sup>a</sup> | 5.00 (2.23) <sup>a</sup>  | 4.10 (1.42) <sup>a</sup>  | 11.26 (3.00) <sup>b</sup>  | 32.34 (7.85) <sup>a</sup>  | 450 (58.7%) <sup>b</sup>   |
|                                                                                 | p                                     | 0.463**                   | 0.201**                   | 0.373**                   | 0.000**                    | 0.010**                    | 0.044***                   |
| <b>How often do you buy gluten-free products?</b>                               |                                       |                           |                           |                           |                            |                            |                            |
|                                                                                 | Never/almost never (n=23)             | 12.52 (3.82) <sup>a</sup> | 6.22 (2.15) <sup>ab</sup> | 4.30 (1.49) <sup>a</sup>  | 11.78 (4.19) <sup>a</sup>  | 34.83 (8.17) <sup>a</sup>  | 17 (73.9%) <sup>a</sup>    |
|                                                                                 | Sometimes (n=154)                     | 11.88 (3.77) <sup>a</sup> | 5.01 (2.24) <sup>a</sup>  | 3.98 (1.47) <sup>a</sup>  | 11.32 (3.15) <sup>a</sup>  | 32.19 (8.23) <sup>a</sup>  | 89 (57.8%) <sup>a</sup>    |
|                                                                                 | Always/almost always (n=604)          | 11.96 (3.52) <sup>a</sup> | 4.93 (2.24) <sup>a</sup>  | 4.11 (1.41) <sup>a</sup>  | 11.13 (2.99) <sup>a</sup>  | 32.13 (7.81) <sup>a</sup>  | 348 (57.6%) <sup>a</sup>   |
|                                                                                 | p                                     | 0.727**                   | 0.026**                   | 0.455**                   | 0.498**                    | 0.275**                    | 0.297***                   |
| <b>Are you satisfied with the gluten-free products you buy?</b>                 |                                       |                           |                           |                           |                            |                            |                            |
|                                                                                 | Not satisfied (n=48)                  | 10.06 (4.09) <sup>a</sup> | 4.33 (2.63) <sup>a</sup>  | 3.42 (1.72) <sup>a</sup>  | 9.69 (3.84) <sup>a</sup>   | 27.50 (9.15) <sup>a</sup>  | 18 (37.5%) <sup>a</sup>    |
|                                                                                 | Little satisfied (n=333)              | 11.26 (3.41) <sup>b</sup> | 4.83 (2.10) <sup>ab</sup> | 4.02 (1.40) <sup>b</sup>  | 10.76 (2.93) <sup>b</sup>  | 30.86 (7.34) <sup>b</sup>  | 169 (50.8%) <sup>a</sup>   |
|                                                                                 | Satisfied (n=391)                     | 12.80 (3.45) <sup>c</sup> | 5.21 (2.30) <sup>b</sup>  | 4.23 (1.38) <sup>b</sup>  | 11.75 (2.90) <sup>c</sup>  | 33.99 (7.76) <sup>c</sup>  | 262 (67.0%) <sup>b</sup>   |
|                                                                                 | p                                     | 0.000**                   | 0.008**                   | 0.000**                   | 0.000**                    | 0.000**                    | 0.000***                   |
| <b>How often do you consume gluten-free products prepared at home?</b>          |                                       |                           |                           |                           |                            |                            |                            |
|                                                                                 | Never/almost never (n=33)             | 9.85 (3.48) <sup>a</sup>  | 3.97 (2.13) <sup>a</sup>  | 3.58 (1.89) <sup>a</sup>  | 9.64 (4.68) <sup>a</sup>   | 27.03 (8.68) <sup>a</sup>  | 12 (36.4%) <sup>a</sup>    |
|                                                                                 | Sometimes (n=159)                     | 11.53 (3.75) <sup>b</sup> | 4.60 (2.06) <sup>ab</sup> | 3.86 (1.52) <sup>ab</sup> | 10.55 (3.12) <sup>ab</sup> | 30.53 (8.15) <sup>b</sup>  | 79 (49.7%) <sup>a</sup>    |
|                                                                                 | Always/almost always (n=589)          | 12.20 (3.49) <sup>b</sup> | 5.15 (2.27) <sup>b</sup>  | 4.18 (1.36) <sup>b</sup>  | 11.44 (2.88) <sup>b</sup>  | 32.97 (7.62) <sup>b</sup>  | 363 (61.6%) <sup>b</sup>   |
|                                                                                 | p                                     | 0.000**                   | 0.001**                   | 0.004**                   | 0.000**                    | 0.000**                    | 0.001***                   |
| <b>If you consume gluten-free products prepared at home, who prepares them?</b> |                                       |                           |                           |                           |                            |                            |                            |
|                                                                                 | Myself (n=686)                        | 12.16 (3.51) <sup>b</sup> | 5.08 (2.20) <sup>b</sup>  | 4.15 (1.40) <sup>b</sup>  | 11.4 (2.93) <sup>b</sup>   | 32.78 (7.68) <sup>b</sup>  | 416 (60.6%) <sup>b</sup>   |
|                                                                                 | Another person (n=49)                 | 10.96 (3.85) <sup>a</sup> | 4.00 (2.38) <sup>a</sup>  | 3.29 (1.55) <sup>a</sup>  | 9.80 (3.55) <sup>a</sup>   | 28.04 (8.56) <sup>a</sup>  | 20 (40.8%) <sup>a</sup>    |
|                                                                                 | p                                     | 0.022*                    | 0.001*                    | 0.000*                    | 0.000*                     | 0.000*                     | 0.006***                   |
| <b>Do the people you live with help you to have a gluten-free diet?</b>         |                                       |                           |                           |                           |                            |                            |                            |
|                                                                                 | Never/almost never (n=52)             | 10.31 (4.26) <sup>a</sup> | 4.33 (2.41) <sup>a</sup>  | 3.63 (1.66) <sup>a</sup>  | 9.87 (4.13) <sup>a</sup>   | 28.13 (9.20) <sup>a</sup>  | 22 (42.3%) <sup>a</sup>    |
|                                                                                 | Sometimes (n=137)                     | 10.66 (3.88) <sup>a</sup> | 4.55 (2.18) <sup>ab</sup> | 3.78 (1.48) <sup>ab</sup> | 10.09 (3.11) <sup>a</sup>  | 29.09 (8.41) <sup>a</sup>  | 57 (41.6%) <sup>a</sup>    |
|                                                                                 | Always/almost always (n=592)          | 12.41 (3.32) <sup>b</sup> | 5.14 (2.22) <sup>b</sup>  | 4.20 (1.38) <sup>b</sup>  | 11.55 (2.85) <sup>b</sup>  | 33.30 (7.34) <sup>b</sup>  | 375 (63.3%) <sup>b</sup>   |

|                                                                                                                           |   |                           |                           |                          |                            |                           |                           |
|---------------------------------------------------------------------------------------------------------------------------|---|---------------------------|---------------------------|--------------------------|----------------------------|---------------------------|---------------------------|
|                                                                                                                           | p | 0.000**                   | 0.002**                   | 0.000**                  | 0.000**                    | 0.000**                   | 0.000***                  |
| <b>I feel socially judged and/or disapproved of for having this gluten-related disorder.</b>                              |   |                           |                           |                          |                            |                           |                           |
| Never/almost never (n=146)                                                                                                |   | 13.61 (3.33) <sup>c</sup> | 5.55 (2.09) <sup>b</sup>  | 4.62 (1.29) <sup>b</sup> | 12.10 (2.77) <sup>c</sup>  | 35.87 (7.04) <sup>c</sup> | 110 (75.3%) <sup>c</sup>  |
| Sometimes (n=376)                                                                                                         |   | 12.10 (3.32) <sup>b</sup> | 5.10 (2.16) <sup>b</sup>  | 4.05 (1.38) <sup>a</sup> | 11.33 (2.99) <sup>b</sup>  | 32.57 (7.47) <sup>b</sup> | 226 (60.1%) <sup>b</sup>  |
| Always/almost always (n=259)                                                                                              |   | 10.83 (3.69) <sup>a</sup> | 4.50 (2.36) <sup>a</sup>  | 3.86 (1.50) <sup>a</sup> | 10.46 (3.16) <sup>a</sup>  | 29.65 (8.09) <sup>a</sup> | 118 (45.6%) <sup>a</sup>  |
|                                                                                                                           | p | 0.000**                   | 0.000**                   | 0.000**                  | 0.000**                    | 0.000**                   | 0.000***                  |
| <b>I feel I can't live a normal life because of this gluten-related disorder.</b>                                         |   |                           |                           |                          |                            |                           |                           |
| Never/almost never (n=182)                                                                                                |   | 13.48 (3.29) <sup>c</sup> | 5.57 (2.22) <sup>c</sup>  | 4.39 (1.35) <sup>b</sup> | 11.97 (2.90) <sup>c</sup>  | 35.41 (7.36) <sup>b</sup> | 137 (75.3%) <sup>c</sup>  |
| Sometimes (n=371)                                                                                                         |   | 11.96 (3.34) <sup>b</sup> | 5.02 (2.14) <sup>b</sup>  | 4.02 (1.41) <sup>a</sup> | 11.26 (2.94) <sup>b</sup>  | 32.26 (7.54) <sup>b</sup> | 217 (58.5%) <sup>b</sup>  |
| Always/almost always (n=228)                                                                                              |   | 10.75 (3.73) <sup>a</sup> | 4.46 (2.31) <sup>a</sup>  | 3.98 (1.48) <sup>a</sup> | 10.43 (3.21) <sup>a</sup>  | 29.61 (7.98) <sup>a</sup> | 100 (43.9%) <sup>a</sup>  |
|                                                                                                                           | p | 0.000**                   | 0.000**                   | 0.005**                  | 0.000**                    | 0.000**                   | 0.000***                  |
| <b>How often do you feel that you cannot eat meals with your colleagues, friends and/or family at meetings or events?</b> |   |                           |                           |                          |                            |                           |                           |
| Never/almost never (n=65)                                                                                                 |   | 13.72 (3.36) <sup>c</sup> | 5.32 (2.23) <sup>ab</sup> | 4.68 (1.16) <sup>b</sup> | 12.22 (2.63) <sup>b</sup>  | 35.94 (7.04) <sup>c</sup> | 46 (70.8%) <sup>b</sup>   |
| Sometimes (n=233)                                                                                                         |   | 12.68 (3.37) <sup>b</sup> | 5.26 (2.21) <sup>b</sup>  | 4.15 (1.43) <sup>a</sup> | 11.53 (3.00) <sup>ab</sup> | 33.63 (7.74) <sup>b</sup> | 148 (63.5%) <sup>ab</sup> |
| Always/almost always (n=483)                                                                                              |   | 11.37 (3.57) <sup>a</sup> | 4.81 (2.25) <sup>a</sup>  | 3.98 (1.44) <sup>a</sup> | 10.88 (3.10) <sup>a</sup>  | 31.04 (7.84) <sup>a</sup> | 260 (53.8%) <sup>a</sup>  |
|                                                                                                                           | p | 0.000**                   | 0.017**                   | 0.001**                  | 0.000**                    | 0.000**                   | 0.005***                  |

\* Student t-test \*\* Anova with Tukey post-hoc test. \*\*\* Pearson's chi-squared test. \*\*\*\* Fisher's exact test. For each variable, the same letters comparing lines do not differ significantly.

**Table S3.** Crossing the scores of the ecSI2.0<sup>TM</sup>BR and sociodemographic data of non-celiac patients (*n* = 249).

|                                                           |                                      | Eating attitude           | Food acceptance          | Internal regulation       | Contextual skills         | Total                      | ecSI2.0 <sup>TM</sup> BR ≥ 32 |
|-----------------------------------------------------------|--------------------------------------|---------------------------|--------------------------|---------------------------|---------------------------|----------------------------|-------------------------------|
|                                                           |                                      | Mean (SD)                 | Mean (SD)                | Mean (SD)                 | Mean (SD)                 | Mean (SD)                  | Freq. (%)                     |
| Gender                                                    | Female (n=244)                       | 11.07 (4.00) <sup>a</sup> | 5.05 (2.20) <sup>a</sup> | 4.00 (1.42) <sup>a</sup>  | 10.73 (3.19) <sup>a</sup> | 30.85 (8.05) <sup>a</sup>  | 121 (49.6%) <sup>a</sup>      |
|                                                           | Male (n=5)                           | 12.40 (4.16) <sup>a</sup> | 6.00 (1.87) <sup>a</sup> | 5.20 (1.30) <sup>a</sup>  | 12.00 (2.65) <sup>a</sup> | 35.60 (7.47) <sup>a</sup>  | 3 (60.0%) <sup>a</sup>        |
|                                                           | p                                    | 0.464*                    | 0.339*                   | 0.062*                    | 0.377*                    | 0.192*                     | 0.684****                     |
| Age                                                       | Up to 40 years old (n=103)           | 10.86 (4.33) <sup>a</sup> | 4.95 (2.18) <sup>a</sup> | 4.03 (1.52) <sup>a</sup>  | 10.17 (3.20) <sup>a</sup> | 30.02 (8.70) <sup>a</sup>  | 44 (42.7%) <sup>a</sup>       |
|                                                           | 40 years or older (n=146)            | 11.27 (3.75) <sup>a</sup> | 5.15 (2.21) <sup>a</sup> | 4.01 (1.36) <sup>a</sup>  | 11.16 (3.11) <sup>a</sup> | 31.60 (7.53) <sup>a</sup>  | 80 (54.8%) <sup>a</sup>       |
|                                                           | p                                    | 0.446*                    | 0.482*                   | 0.933*                    | 0.015*                    | 0.128*                     | 0.061***                      |
| Educational level                                         | Up to high school (n=44)             | 10.32 (3.96) <sup>a</sup> | 5.00 (2.21) <sup>a</sup> | 3.98 (1.50) <sup>a</sup>  | 10.45 (3.08) <sup>a</sup> | 29.75 (7.86) <sup>ab</sup> | 20 (45.5%) <sup>a</sup>       |
|                                                           | Undergraduate (n=101)                | 10.98 (4.07) <sup>a</sup> | 4.67 (2.29) <sup>a</sup> | 3.98 (1.57) <sup>a</sup>  | 10.30 (3.19) <sup>a</sup> | 29.93 (8.39) <sup>a</sup>  | 46 (45.5%) <sup>a</sup>       |
|                                                           | Graduate (n=104)                     | 11.55 (3.92) <sup>a</sup> | 5.48 (2.03) <sup>a</sup> | 4.08 (1.24) <sup>a</sup>  | 11.33 (3.15) <sup>a</sup> | 32.43 (7.61) <sup>b</sup>  | 58 (55.8%) <sup>a</sup>       |
|                                                           | p                                    | 0.215**                   | 0.030**                  | 0.869**                   | 0.053**                   | 0.046**                    | 0.280***                      |
| Income                                                    | Up to R\$ 3.000.00 (n=69)            | 10.06 (3.91) <sup>a</sup> | 4.74 (2.14) <sup>a</sup> | 3.80 (1.49) <sup>a</sup>  | 10.28 (2.78) <sup>a</sup> | 28.87 (7.62) <sup>a</sup>  | 27 (39.1%) <sup>a</sup>       |
|                                                           | R\$ 3.001.00 to R\$ 5.000.00 (n=42)  | 11.26 (4.21) <sup>a</sup> | 4.88 (2.12) <sup>a</sup> | 4.10 (1.34) <sup>a</sup>  | 11.02 (2.97) <sup>a</sup> | 31.26 (7.53) <sup>a</sup>  | 21 (50.0%) <sup>a</sup>       |
|                                                           | R\$ 5.001.00 to R\$ 10.000.00 (n=56) | 10.95 (4.23) <sup>a</sup> | 5.41 (2.20) <sup>a</sup> | 3.82 (1.45) <sup>a</sup>  | 10.27 (3.65) <sup>a</sup> | 30.45 (8.94) <sup>a</sup>  | 29 (51.8%) <sup>a</sup>       |
|                                                           | R\$ 10.001.00 to R\$20.000.00 (n=45) | 11.58 (4.00) <sup>a</sup> | 5.04 (2.09) <sup>a</sup> | 4.24 (1.52) <sup>a</sup>  | 10.84 (3.36) <sup>a</sup> | 31.71 (8.41) <sup>a</sup>  | 26 (57.8%) <sup>a</sup>       |
|                                                           | More than R\$ 20.000.00 (n=18)       | 11.56 (2.62) <sup>a</sup> | 6.11 (2.40) <sup>a</sup> | 4.28 (0.83) <sup>a</sup>  | 11.61 (2.91) <sup>a</sup> | 33.56 (6.07) <sup>a</sup>  | 9 (50.0%) <sup>a</sup>        |
|                                                           | p                                    | 0.269**                   | 0.117**                  | 0.350**                   | 0.386**                   | 0.148**                    | 0.371***                      |
| <b>Do you have any other restrictions besides gluten?</b> |                                      |                           |                          |                           |                           |                            |                               |
|                                                           | Yes (n=185)                          | 11.10 (3.90) <sup>a</sup> | 5.12 (2.18) <sup>a</sup> | 4.13 (1.34) <sup>a</sup>  | 11.08 (3.13) <sup>b</sup> | 31.43 (7.83) <sup>a</sup>  | 95 (51.4%) <sup>a</sup>       |
|                                                           | No (n=64)                            | 11.11 (4.30) <sup>a</sup> | 4.91 (2.26) <sup>a</sup> | 3.70 (1.62) <sup>a</sup>  | 9.81 (3.15) <sup>a</sup>  | 29.53 (8.57) <sup>a</sup>  | 29 (45.3%) <sup>a</sup>       |
|                                                           | p                                    | 0.983*                    | 0.495*                   | 0.061*                    | 0.006*                    | 0.104*                     | 0.405***                      |
| <b>Do you follow a gluten-free diet?</b>                  |                                      |                           |                          |                           |                           |                            |                               |
|                                                           | Never/almost never (n=3)             | 10.00 (3.61) <sup>a</sup> | 3.67 (0.58) <sup>a</sup> | 2.67 (1.53) <sup>ab</sup> | 8.00 (4.36) <sup>ab</sup> | 24.33 (6.81) <sup>ab</sup> | 1 (33.3%) <sup>ab</sup>       |
|                                                           | Sometimes (n=30)                     | 9.90 (3.74) <sup>a</sup>  | 4.57 (2.27) <sup>a</sup> | 3.40 (1.28) <sup>a</sup>  | 8.87 (3.18) <sup>a</sup>  | 26.73 (8.25) <sup>a</sup>  | 8 (26.7%) <sup>a</sup>        |
|                                                           | Always/almost always (n=216)         | 11.28 (4.02) <sup>a</sup> | 5.16 (2.19) <sup>a</sup> | 4.13 (1.42) <sup>b</sup>  | 11.06 (3.07) <sup>b</sup> | 31.62 (7.85) <sup>b</sup>  | 115 (53.2%) <sup>b</sup>      |
|                                                           | p                                    | 0.185**                   | 0.208**                  | 0.008**                   | 0.001**                   | 0.003**                    | 0.021***                      |

|                                                                                                                    |                            |                           |                           |                            |                            |                          |  |
|--------------------------------------------------------------------------------------------------------------------|----------------------------|---------------------------|---------------------------|----------------------------|----------------------------|--------------------------|--|
| How often do you buy gluten-free products?                                                                         |                            |                           |                           |                            |                            |                          |  |
| Never/almost never (n=15)                                                                                          | 9.07 (3.75) <sup>a</sup>   | 4.33 (2.44) <sup>a</sup>  | 3.27 (1.44) <sup>a</sup>  | 9.07 (3.63) <sup>a</sup>   | 25.73 (7.59) <sup>a</sup>  | 4 (26.7%) <sup>a</sup>   |  |
| Sometimes (n=78)                                                                                                   | 10.60 (3.77) <sup>ab</sup> | 4.94 (1.87) <sup>a</sup>  | 3.97 (1.31) <sup>a</sup>  | 10.26 (3.29) <sup>ab</sup> | 29.77 (7.49) <sup>ab</sup> | 32 (41.0%) <sup>ab</sup> |  |
| Always/almost always (n=156)                                                                                       | 11.54 (4.06) <sup>b</sup>  | 5.21 (2.31) <sup>a</sup>  | 4.12 (1.47) <sup>a</sup>  | 11.17 (3.00) <sup>b</sup>  | 32.03 (8.13) <sup>b</sup>  | 88 (56.4%) <sup>b</sup>  |  |
| p                                                                                                                  | 0.029**                    | 0.278**                   | 0.083**                   | 0.012**                    | 0.004**                    | 0.015***                 |  |
| Are you satisfied with the gluten-free products you buy?                                                           |                            |                           |                           |                            |                            |                          |  |
| Not satisfied (n=19)                                                                                               | 9.74 (4.48) <sup>a</sup>   | 4.42 (1.92) <sup>a</sup>  | 3.79 (1.72) <sup>a</sup>  | 8.37 (4.09) <sup>a</sup>   | 26.32 (9.79) <sup>a</sup>  | 5 (26.3%) <sup>a</sup>   |  |
| Little satisfied (n=119)                                                                                           | 10.34 (3.88) <sup>ab</sup> | 4.94 (2.30) <sup>a</sup>  | 3.97 (1.25) <sup>a</sup>  | 10.34 (3.18) <sup>b</sup>  | 29.60 (7.97) <sup>ab</sup> | 49 (41.2%) <sup>ab</sup> |  |
| Satisfied (n=106)                                                                                                  | 12.11 (3.81) <sup>b</sup>  | 5.40 (2.05) <sup>a</sup>  | 4.08 (1.53) <sup>a</sup>  | 11.58 (2.67) <sup>b</sup>  | 33.17 (7.07) <sup>b</sup>  | 66 (62.3%) <sup>b</sup>  |  |
| p                                                                                                                  | 0.001**                    | 0.109**                   | 0.660**                   | 0.000**                    | 0.000**                    | 0.001***                 |  |
| How often do you consume gluten-free products prepared at home?                                                    |                            |                           |                           |                            |                            |                          |  |
| Never/almost never (n=11)                                                                                          | 9.18 (4.42) <sup>a</sup>   | 5.91 (2.17) <sup>a</sup>  | 4.18 (1.08) <sup>a</sup>  | 9.27 (4.47) <sup>ab</sup>  | 28.55 (9.27) <sup>ab</sup> | 3 (27.3%) <sup>ab</sup>  |  |
| Sometimes (n=69)                                                                                                   | 10.68 (3.68) <sup>a</sup>  | 4.81 (2.18) <sup>a</sup>  | 3.94 (1.37) <sup>a</sup>  | 9.81 (3.26) <sup>a</sup>   | 29.25 (8.07) <sup>a</sup>  | 28 (40.6%) <sup>a</sup>  |  |
| Always/almost always (n=169)                                                                                       | 11.40 (4.07) <sup>a</sup>  | 5.12 (2.20) <sup>a</sup>  | 4.04 (1.47) <sup>a</sup>  | 11.24 (2.95) <sup>b</sup>  | 31.79 (7.87) <sup>b</sup>  | 93 (55.0%) <sup>b</sup>  |  |
| p                                                                                                                  | 0.121**                    | 0.268**                   | 0.826**                   | 0.002**                    | 0.050**                    | 0.040***                 |  |
| If you consume gluten-free products prepared at home, who prepares them?                                           |                            |                           |                           |                            |                            |                          |  |
| Myself (n=216)                                                                                                     | 11.26 (4.01) <sup>a</sup>  | 5.09 (2.19) <sup>a</sup>  | 4.05 (1.43) <sup>a</sup>  | 11.04 (3.08) <sup>b</sup>  | 31.45 (8.01) <sup>b</sup>  | 115 (53.2%) <sup>b</sup> |  |
| Another person (n=13)                                                                                              | 9.92 (4.11) <sup>a</sup>   | 4.54 (1.90) <sup>a</sup>  | 3.62 (1.19) <sup>a</sup>  | 8.77 (3.03) <sup>a</sup>   | 26.85 (7.40) <sup>a</sup>  | 3 (23.1%) <sup>a</sup>   |  |
| p                                                                                                                  | 0.243*                     | 0.373*                    | 0.284*                    | 0.010*                     | 0.045*                     | 0.045***                 |  |
| Do the people you live with help you to have a gluten-free diet?                                                   |                            |                           |                           |                            |                            |                          |  |
| Never/almost never (n=33)                                                                                          | 9.18 (3.90) <sup>a</sup>   | 4.45 (2.48) <sup>a</sup>  | 3.48 (1.50) <sup>a</sup>  | 9.36 (3.53) <sup>a</sup>   | 26.48 (8.81) <sup>a</sup>  | 10 (30.3%) <sup>a</sup>  |  |
| Sometimes (n=79)                                                                                                   | 9.78 (4.03) <sup>a</sup>   | 4.56 (2.06) <sup>a</sup>  | 3.94 (1.27) <sup>ab</sup> | 10.29 (3.18) <sup>ab</sup> | 28.57 (7.88) <sup>a</sup>  | 25 (31.6%) <sup>a</sup>  |  |
| Always/almost always (n=137)                                                                                       | 12.32 (3.58) <sup>b</sup>  | 5.51 (2.12) <sup>b</sup>  | 4.20 (1.46) <sup>b</sup>  | 11.36 (2.95) <sup>b</sup>  | 33.39 (7.09) <sup>b</sup>  | 89 (65.0%) <sup>b</sup>  |  |
| p                                                                                                                  | 0.000**                    | 0.002**                   | 0.029**                   | 0.001**                    | 0.000**                    | 0.000***                 |  |
| I feel socially judged and/or disapproved of for having this gluten-related disorder.                              |                            |                           |                           |                            |                            |                          |  |
| Never/almost never (n=62)                                                                                          | 12.06 (3.87) <sup>b</sup>  | 5.47 (2.29) <sup>a</sup>  | 4.26 (1.35) <sup>b</sup>  | 11.74 (2.63) <sup>b</sup>  | 33.53 (7.22) <sup>b</sup>  | 36 (58.1%) <sup>b</sup>  |  |
| Sometimes (n=118)                                                                                                  | 11.51 (3.80) <sup>b</sup>  | 4.99 (2.19) <sup>a</sup>  | 4.09 (1.40) <sup>ab</sup> | 10.67 (3.31) <sup>ab</sup> | 31.26 (8.14) <sup>b</sup>  | 63 (53.4%) <sup>ab</sup> |  |
| Always/almost always (n=69)                                                                                        | 9.54 (4.05) <sup>a</sup>   | 4.84 (2.11) <sup>a</sup>  | 3.68 (1.49) <sup>a</sup>  | 10.01 (3.21) <sup>a</sup>  | 28.07 (7.81) <sup>a</sup>  | 25 (36.2%) <sup>a</sup>  |  |
| p                                                                                                                  | 0.000**                    | 0.231**                   | 0.050**                   | 0.007**                    | 0.000**                    | 0.025***                 |  |
| I feel I can't live a normal life because of this gluten-related disorder.                                         |                            |                           |                           |                            |                            |                          |  |
| Never/almost never (n=80)                                                                                          | 12.75 (3.47) <sup>b</sup>  | 5.79 (2.29) <sup>b</sup>  | 4.39 (1.35) <sup>b</sup>  | 12.08 (2.55) <sup>b</sup>  | 35.00 (6.64) <sup>c</sup>  | 55 (68.8%) <sup>c</sup>  |  |
| Sometimes (n=104)                                                                                                  | 10.85 (3.97) <sup>a</sup>  | 5.05 (2.09) <sup>b</sup>  | 3.94 (1.46) <sup>ab</sup> | 10.55 (3.34) <sup>a</sup>  | 30.38 (8.00) <sup>b</sup>  | 51 (49.0%) <sup>b</sup>  |  |
| Always/almost always (n=65)                                                                                        | 9.48 (3.93) <sup>a</sup>   | 4.22 (1.96) <sup>a</sup>  | 3.69 (1.39) <sup>a</sup>  | 9.46 (3.03) <sup>a</sup>   | 26.85 (7.45) <sup>a</sup>  | 18 (27.7%) <sup>a</sup>  |  |
| p                                                                                                                  | 0.000**                    | 0.000**                   | 0.010**                   | 0.000**                    | 0.000**                    | 0.000***                 |  |
| How often do you feel that you cannot eat meals with your colleagues, friends and/or family at meetings or events? |                            |                           |                           |                            |                            |                          |  |
| Never/almost never (n=34)                                                                                          | 12.03 (3.57) <sup>ab</sup> | 5.79 (2.25) <sup>b</sup>  | 4.09 (1.58) <sup>a</sup>  | 11.50 (3.48) <sup>a</sup>  | 33.41 (8.42) <sup>b</sup>  | 22 (64.7%) <sup>a</sup>  |  |
| Sometimes (n=88)                                                                                                   | 11.73 (3.91) <sup>b</sup>  | 5.18 (2.16) <sup>ab</sup> | 4.05 (1.36) <sup>a</sup>  | 11.02 (2.87) <sup>a</sup>  | 31.98 (7.60) <sup>ab</sup> | 47 (53.4%) <sup>a</sup>  |  |
| Always/almost always (n=127)                                                                                       | 10.42 (4.07) <sup>a</sup>  | 4.80 (2.17) <sup>a</sup>  | 3.98 (1.44) <sup>a</sup>  | 10.37 (3.27) <sup>a</sup>  | 29.57 (8.05) <sup>a</sup>  | 55 (43.3%) <sup>a</sup>  |  |
| p                                                                                                                  | 0.021**                    | 0.050**                   | 0.912**                   | 0.113**                    | 0.015**                    | 0.060***                 |  |

\* Student t-test \*\* Anova with Tukey post-hoc test. \*\*\* Pearson's chi-squared test. \*\*\*\* Fisher's exact test. For each variable, the same letters comparing lines do not differ significantly.
